# Supplementary material
Source: publisher site journal article supplement (https://www.dovepress.com/article/188186)
Supplement: Supplementary file 1 [file get_supplementary_file.php]

# Online Supplement

## **Measurement Techniques and inclusion criteria for the study:**

NT-proBNP was measured using the RAMP® diagnostic rapid kit (Response Biomedical Corp, Vancouver, BC, Canada) in whole blood specimens collected in EDTA tubes. RAMP assay uses quantitative immunochromatography and has a measurement range of 18 to 35,000 ng/L. Serum CRP was measured via a high-sensitivity assay on the Advia® 1800 Chemistry System analyzer (Siemens Healthcare GmbH, Erlangen, Germany), located in the Clinical Laboratory of St Paul's Hospital (Department of Pathology and Laboratory Medicine, Vancouver, BC). The analytical range of the assay is 0.2 to 200.0 mg/L including an auto-dilution capability on board the analyzer. In cases where the samples were over the analytical range, they were manually diluted. Complete blood count and differential were measured on whole blood specimens collected in EDTA tubes using the ADVIA® 2120i Hematology System (Siemens Healthcare GmbH, Erlangen, Germany). Baseline lung function measurements were performed at the time of convalescence (i.e., at day 30 or day 90) for AECOPD patients. Spirometry was used to obtain lung function parameters after bronchodilator administration according to recommendations from ATS/ERS guidelines.<sup>1</sup> Sputum samples were collected on day-1 in OMNIgene®•ORAL (OM-505) tubes and stored in -80 °C freezers until measurement. The tubes were thawed in a hot bath at 50 °C for 1 hour and then placed in an air incubator at 24 °C for 30 minutes. Next, sputolysin was added in 1:1 ratio to liquefy the samples; after which the samples were sub-aliquoted into 500 uL volumes and stored at -80 °C.

For quantifying bacterial load, DNA was extracted from a 500 uL aliquot using the DNeasy Tissue and Blood extraction kit (Qiagen). The aliquot was centrifuged for 10 minutes at 7500 RPM to form a pellet. After the supernatant was discarded, the pellet was resuspended in 180 uL buffer ATL, according to manufacturer's instructions (DNeasy, Qiagen). DNA concentration was measured using Nanodrop. Droplet digital PCR (ddPCR) (Bio-Rad QX200) was used to quantify the bacterial load, which uses an EvaGreen qPCR assay with primers specifying the 293bp amplicon of the 16S rRNA gene.<sup>2</sup> Briefly, the following protocol was used: 1 cycle at 95°C for 5 minutes, 40 cycles at 95°C for 15 seconds and 60°C for 1 minute, 1 cycle at 4°C for 5 minutes, and 1 cycle at 90°C for 5 minutes all at a ramp rate of 2°C/second. Bio-Rad's T100 thermal cycler was used for the PCR step. A threshold cutoff of 10.000 and a 1/10 dilution of the samples were chosen based on preliminary experiments. Negative controls that comprised of DNase and RNase free water were used and ran alongside the samples. Finally, a correction factor using the formula ([average number of 16S copies per sample – average number of 16S copies in the negative control] / DNA concentration) was applied. In order to extract DNA and RNA simultaneously from the samples, QIAamp MinElute Virus Spin Kit (Qiagen) was used according to manufacturer's instructions. The nucleic acid concentration was then measured using Nanodrop. The extracted nucleic acid samples were sent in 50 uL volumes to Randox Laboratories (Crumlin, UK) for molecular pathogen detection.

The inclusion criteria were being 19 years of age or older, having a diagnosis of COPD, admission to a hospital for a COPD exacerbation or attending the clinic and not experiencing an exacerbation.

## **Principles and Procedure of the Randox Respiratory Multiplex Array**

The Respiratory Multiplex Array II is designed to rapidly screen for the presence of 22 different respiratory pathogens simultaneously from one patient sample. The array is based on a combination of multiplex PCR, target hybridization and chemiluminescence to allow qualitative detection of respiratory pathogens within specimens. The array is approved for nasal swab, bronchoalveolar lavage or sputum specimens. The first step is nucleic acid extraction, and the recommended kit is QIAamp MinElute Virus Spin Kit (Qiagen). After that, a one-step process of reverse transcription combined with multiplex PCR amplification is performed to allow detection of both viral and bacterial nucleic acids within the specimen. If respiratory pathogens are present within the sample, target genes will be amplified to detectable levels. Amplified samples are then added to the Biochip permitting target gene sequences to hybridize to complementary probes spotted on specific regions of the Biochip surface. The Biochip is then imaged on the Evidence Investigator™ where onboard software will

identify the presence of respiratory pathogens within the sample. An extraction control (EC) is incorporated into the array which confirms successful sample nucleic acid extraction and PCR amplification.

**Table S1: Pathogens Covered by the Randox Array**

| <b>Bacteria</b>          | <b>Viruses</b>                      |
|--------------------------|-------------------------------------|
| Legionella pneumophila   | Influenza A virus                   |
| Chlamydophila pneumoniae | Influenza B virus                   |
| Mycoplasma pneumoniae    | Human respiratory syncytial virus A |
| Moraxella catarrhalis    | Human respiratory syncytial virus B |
| Streptococcus pneumoniae | Human parainfluenza virus 1         |
| Bordetella pertussis     | Human parainfluenza virus 2         |
| Haemophilus influenzae   | Human parainfluenza virus 3         |
|                          | Human parainfluenza virus 4         |
|                          | Human coronavirus 229E/NL63         |
|                          | Human coronavirus OC43/HKU1         |
|                          | Human adenovirus A/B/C/D/E          |
|                          | Human rhinovirus A/B/C              |
|                          | Human enterovirus A/B/C             |
|                          | Human bocavirus 1/2/3               |
|                          | Human Metapneumovirus               |

**Table S2: List of the Pathogens Detected for Each Patient in the Cohort**

| <b>Patient</b> | <b>Pathogen 1</b> | <b>Pathogen 2</b> | <b>Pathogen 3</b> | <b>Pathogen 4</b> |
|----------------|-------------------|-------------------|-------------------|-------------------|
| 1              | Negative          |                   |                   |                   |
| 2              | HI                | FLU B             |                   |                   |
| 3              | Negative          |                   |                   |                   |
| 4              | HRV               | HI                | FLU B             |                   |
| 5              | HRV               |                   |                   |                   |
| 6              | HI                |                   |                   |                   |
| 7              | Negative          |                   |                   |                   |
| 8              | Negative          |                   |                   |                   |
| 9              | HRV               |                   |                   |                   |
| 10             | SP                |                   |                   |                   |
| 11             | Negative          |                   |                   |                   |
| 12             | HRV               |                   |                   |                   |
| 13             | HI                | SP                | FLU B             |                   |
| 14             | Negative          |                   |                   |                   |
| 15             | SP                |                   |                   |                   |
| 16             | Negative          |                   |                   |                   |
| 17             | Negative          |                   |                   |                   |
| 18             | Negative          |                   |                   |                   |
| 19             | HI                |                   |                   |                   |
| 20             | FLU A             | HI                | SP                |                   |
| 21             | SP                |                   |                   |                   |
| 22             | HRV               |                   |                   |                   |
| 23             | Negative          |                   |                   |                   |
| 24             | SP                |                   |                   |                   |
| 25             | HI                |                   |                   |                   |
| 26             | Negative          |                   |                   |                   |
| 27             | RSV A             | HI                |                   |                   |
| 28             | RSV A             | HI                | MCAT              |                   |
| 29             | PIV 3             |                   |                   |                   |
| 30             | HI                |                   |                   |                   |
| 31             | HI                |                   |                   |                   |
| 32             | HI                |                   |                   |                   |
| 33             | FLU A             | HI                | SP                |                   |
| 34             | FLU A             | HRV               | SP                | CORO              |
| 35             | Negative          |                   |                   |                   |
| 36             | FLUA              | HRV               | SP                |                   |
| 37             | PIV 4             |                   |                   |                   |
| 38             | SP                |                   |                   |                   |
| 39             | FLU A             | HI                | SP                |                   |
| 40             | HI                | MPV               | SP                |                   |
| 41             | Negative          |                   |                   |                   |
| 42             | HI                | SP                |                   |                   |
| 43             | HRV               |                   |                   |                   |
| 44             | SP                |                   |                   |                   |
| 45             | HI                | SP                |                   |                   |
| 46             | HI                | SP                |                   |                   |

|    |          |       |
|----|----------|-------|
| 47 | HI       |       |
| 48 | Negative |       |
| 49 | HAV      | RSV A |
| 50 | Negative |       |
| 51 | HI       | SP    |
| 52 | Negative |       |
| 53 | MCAT     | SP    |
| 54 | Negative |       |
| 55 | HRV      | SP    |
| 56 | HRV      | SP    |
| 57 | PIV 4    |       |
| 58 | HI       |       |
| 59 | HI       |       |
| 60 | PIV 2    |       |
| 61 | SP       | CORO  |
| 62 | Negative |       |
| 63 | HI       |       |
| 64 | HRV      |       |
| 65 | Negative |       |
| 66 | FLU A    |       |
| 67 | HI       | SP    |
| 68 | HI       |       |
| 69 | HI       |       |
| 70 | HI       |       |
| 71 | HI       |       |
| 72 | Negative |       |

HI: haemophilus influenzae; SP: streptococcus pneumoniae; HRV: human rhinovirus; FLU: influenza virus; RSV: respiratory syncytial virus; MCAT: moraxella catarrhalis; PIV: parainfluenza virus; HAV: human adenovirus; MPV: metapneumovirus; CORO: coronavirus.

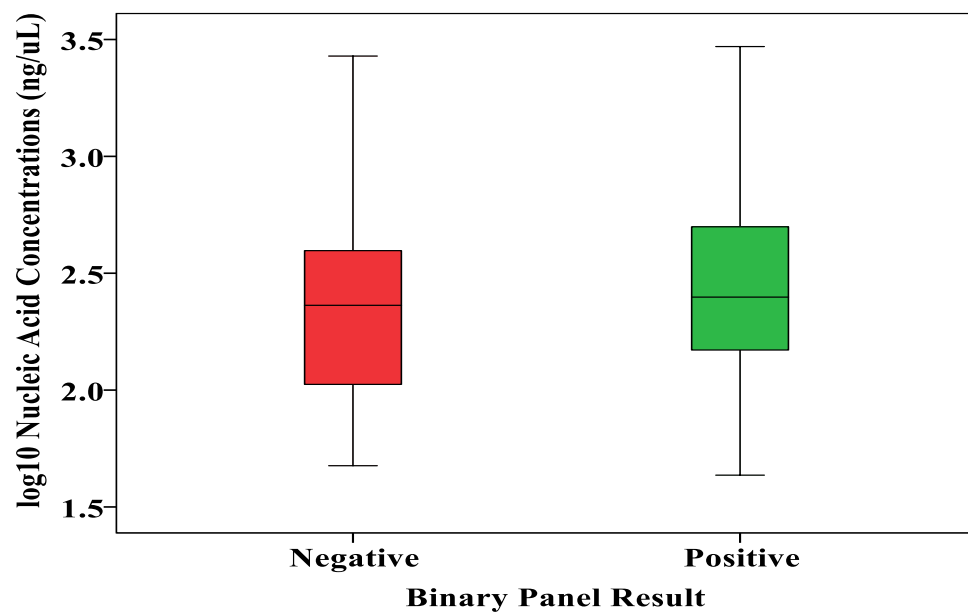

**Figure S1:** Box plots representing the nucleic acid concentration in the patients in which no pathogens were detected and the ones with positive pathogen detection. There was no statistically significant difference between the groups ( $P=0.71$ ).

**Table S3: Demographic and Clinical Data of Study Patients in the Pathogen-negative and Positive groups**

|                                              | Negative Group      | Positive Group       | P-value      |
|----------------------------------------------|---------------------|----------------------|--------------|
| <b>Age (years)</b>                           | 68.2 ± 11           | 64.8 ± 11.6          | 0.273        |
| <b>Male sex</b>                              | 55%                 | 67.3%                | 0.414        |
| <b>BMI (kg/m<sup>2</sup>)</b>                | 22.7 ± 4.7          | 25.2 ± 7.5           | 0.404        |
| <b>Caucasian</b>                             | 85%                 | 78.8%                | 0.744        |
| <b>Current smokers</b>                       | 45%                 | 68.6%                | 0.102        |
| <b>Pack years</b>                            | 40 (15-60)          | 47 (37-70.5)         | 0.192        |
| <b>Cardiac comorbidities</b>                 | 35%                 | 40.4%                | 0.790        |
| <b>Home O2 use</b>                           | 35%                 | 14%                  | 0.094        |
| <b>ICS use</b>                               | 75%                 | 68.6%                | 0.774        |
| <b>16S copies (copies/ng/ul)</b>             | 20.5 (5.5-108)      | 35.9 (8.7-84.9)      | 0.624        |
| <b>eGFR (mL/min/1.73 m<sup>2</sup>)</b>      | 78.6 ± 26           | 81.7 ± 25.4          | 0.652        |
| <b>FEV<sub>1</sub>, percent predicted</b>    | 44.6 ± 14.5         | 47.3 ± 17.5          | 0.613        |
| <b>FEV/FVC ratio (%)</b>                     | 74.4 ± 18.1         | 69.8 ± 16.2          | 0.447        |
| <b>GOLD 1</b>                                | 0%                  | 4.9%                 |              |
| <b>GOLD 2</b>                                | 28.6%               | 39%                  |              |
| <b>GOLD 3</b>                                | 57.1%               | 36.6%                |              |
| <b>GOLD 4</b>                                | 14.3%               | 19.5%                |              |
| <b>NT-proBNP (ng/L)</b>                      | 1216.5 (311-1920.7) | 369 (183-843)        | <b>0.042</b> |
| <b>NT-proBNP change at day-30*</b>           | -1102 [-1768 to 61] | -127.5 [-458 to -30] | <b>0.19</b>  |
| <b>CRP (mg/L)</b>                            | 25.7 (8.3-98.5)     | 56.5 (21.6-150.3)    | 0.382        |
| <b>Length of hospital stay (Days)</b>        | 6.5 (5-17)          | 6 (3-8)              | 0.096        |
| <b>WBC (10<sup>3</sup> cells/uL)</b>         | 11.1 (5.6-12.7)     | 8.7 (5.8-13.8)       | 0.851        |
| <b>Neutrophils (10<sup>3</sup> cells/uL)</b> | 8.8 (4.2-11.9)      | 6.3 (4.3-11.9)       | 1            |
| <b>Neutrophil%</b>                           | 84.6 (74.5-93.6)    | 85.1 (79-90.4)       | 0.939        |
| <b>Lymphocytes (10<sup>3</sup> cells/uL)</b> | 0.8 ± 0.5           | 0.8 ± 0.5            | 0.891        |
| <b>Lymphocyte%</b>                           | 11.4 ± 8.4          | 9.3 ± 5.5            | 0.377        |
| <b>Eosinophils (10<sup>3</sup> cells/uL)</b> | 0.007 (0-0.07)      | 0.025 (0.01-0.06)    | 0.139        |
| <b>Eosinophil %</b>                          | 0.1 (0-1.3)         | 0.2 (0.1-0.6)        | 0.246        |
| <b>Monocytes (10<sup>3</sup> cells/uL)</b>   | 0.2 (0.1-0.7)       | 0.4 (0.2-0.6)        | 0.513        |

|                                                |                       |                        |              |
|------------------------------------------------|-----------------------|------------------------|--------------|
| <b>Monocyte%</b>                               | 4.8 ± 4.1             | 4.8 ± 3.1              | 0.984        |
| <b>Basophils<br/>(10<sup>3</sup> cells/uL)</b> | 0.01<br>(0-0.06)      | 0.02<br>(0.01-0.04)    | 0.695        |
| <b>Basophil%</b>                               | 0.2<br>(0.09-0.7)     | 0.2<br>(0.1-0.4)       | 0.988        |
| <b>RBC<br/>(10<sup>6</sup> cells/uL)</b>       | 3.8<br>(3.1-4.4)      | 4.5<br>(4-4.8)         | <b>0.029</b> |
| <b>Hematocrit</b>                              | 32.5<br>(29.8-39)     | 39<br>(35.6-42.9)      | <b>0.029</b> |
| <b>Hemoglobin<br/>(g/L)</b>                    | 114<br>(95-133)       | 128.5<br>(111.5-138.5) | <b>0.031</b> |
| <b>MCV</b>                                     | 89.4 ± 8.7            | 88.4 ± 5.3             | 0.714        |
| <b>MCH</b>                                     | 29.8<br>(27.9-31.5)   | 28.7<br>(26.9-31.4)    | 0.432        |
| <b>MCHC</b>                                    | 335.5<br>(32.2-341.2) | 330<br>(31.1-342.7)    | 0.590        |
| <b>Platelets<br/>(10<sup>3</sup> cells/uL)</b> | 229<br>(182-269)      | 213.5<br>(162.2-308.2) | 0.761        |
| <b>RDW%</b>                                    | 16.2<br>(14.4-20)     | 14.6<br>(13.9-16.1)    | <b>0.025</b> |

Data are represented as mean ±SD or median and interquartile ranges. ICS: inhaled corticosteroid; eGFR: estimated glomerular filtration rate; MCV: mean corpuscular volume; MCH: mean corpuscular hemoglobin; MCHC: mean corpuscular hemoglobin concentration; RDW: red blood cell distribution width; GOLD: global initiative for obstructive lung disease. \*calculated as NT-proBNP taken at the 30th day from admission minus the NT-proBNP taken at the day of admission.

**Table S4: Demographic and Clinical Data of Study Patients in the Pathogen-negative, Virus and Bacteria groups**

|                                              | <b>Negative Group</b> | <b>Virus Group</b>     | <b>Bacteria Group</b> | <b>P-value</b> |
|----------------------------------------------|-----------------------|------------------------|-----------------------|----------------|
| <b>Age (years)</b>                           | 68.2 ± 11.1           | 64.5 ± 12.6            | 65.3 ± 10.8           | 0.533          |
| <b>Male sex</b>                              | 55%                   | 61.5%                  | 73.1%                 | 0.459          |
| <b>BMI (kg/m<sup>2</sup>)</b>                | 22.7 ± 4.7            | 26.8 ± 9.8             | 23.9 ± 4.8            | 0.513          |
| <b>Caucasian</b>                             | 85%                   | 80.8%                  | 76.9%                 | 0.930          |
| <b>Current smokers</b>                       | 45%                   | 72%                    | 65.4%                 | 0.180          |
| <b>Pack years</b>                            | 40 (15-60)            | 40 (30-70)             | 57.5 (40-71.5)        | 0.178          |
| <b>Cardiac comorbidities</b>                 | 35%                   | 42.3%                  | 38.5%                 | 0.953          |
| <b>Home O2 use</b>                           | 35%                   | 16.7%                  | 11.5%                 | 0.161          |
| <b>ICS use</b>                               | 75%                   | 64%                    | 73.1%                 | 0.683          |
| <b>16S copies (copies/ng/ul)</b>             | 20.5 (5.5-108)        | 35.9 (9.7-97.2)        | 34.2 (6.5-86.9)       | 0.789          |
| <b>eGFR (mL/min/1.73 m<sup>2</sup>)</b>      | 78.6 ± 26             | 85.8 ± 27              | 77.8 ± 23.5           | 0.483          |
| <b>FEV<sub>1</sub>, percent predicted</b>    | 44.6 ± 14.5           | 51 ± 18.4              | 43.7 ± 16.2           | 0.340          |
| <b>FEV/FVC ratio (%)</b>                     | 74.4 ± 18.1           | 70.7 ± 16.8            | 69.1 ± 16.1           | 0.721          |
| <b>GOLD 1</b>                                | 0%                    | 10%                    | 0%                    |                |
| <b>GOLD 2</b>                                | 28.6%                 | 45%                    | 33.3%                 |                |
| <b>GOLD 3</b>                                | 57.1%                 | 25%                    | 47.6%                 |                |
| <b>GOLD 4</b>                                | 14.3%                 | 20%                    | 19%                   |                |
| <b>NT-proBNP (ng/L)</b>                      | 1216.5 (311-1920.7)   | 370 (199.7-1379.2)     | 310 (165-713)         | 0.081          |
| <b>NT-proBNP change at day-30*</b>           | -1102 [-1768 to 61]   | -130.5 [-474 to -43.5] | -127.5 [-458 to -2.2] | 0.391          |
| <b>CRP (mg/L)</b>                            | 25.7 (8.3-98.5)       | 40.1 (26-71.1)         | 76.8 (11.7-179.7)     | 0.618          |
| <b>Length of hospital stay (Days)</b>        | 6.5 (5-17)            | 6 (3.75-13.5)          | 5 (3-7)               | <b>0.046</b>   |
| <b>WBC (10<sup>3</sup> cells/uL)</b>         | 11.1 (5.6-12.7)       | 6.5 (5.4-12.6)         | 10.4 (6.4-14.1)       | 0.745          |
| <b>Neutrophils (10<sup>3</sup> cells/uL)</b> | 8.8 (4.2-11.9)        | 5.5 (4.2-11.2)         | 6.5 (4.5-12.9)        | 0.812          |
| <b>Neutrophil%</b>                           | 84.6 (74.5-93.6)      | 85.2 (78.9-91.3)       | 85 (77.9-89.9)        | 0.966          |
| <b>Lymphocytes (10<sup>3</sup> cells/uL)</b> | 0.8 ± 0.5             | 0.7 ± 0.4              | 0.9 ± 0.6             | 0.666          |
| <b>Lymphocyte %</b>                          | 11.4 ± 8.4            | 9.6 ± 6.1              | 9.1 ± 5.2             | 0.669          |
| <b>Eosinophils (10<sup>3</sup> cells/uL)</b> | 0.007 (0-0.07)        | 0.03 (0-0.1)           | 0.02 (0.01-0.05)      | 0.326          |



|                                                |                       |                     |                     |              |
|------------------------------------------------|-----------------------|---------------------|---------------------|--------------|
| <b>Eosinophil %</b>                            | 0.1<br>(0-1.3)        | 0.3<br>(0.1-1.3)    | 0.2<br>(0.1-0.4)    | 0.460        |
| <b>Monocytes<br/>(10<sup>3</sup> cells/uL)</b> | 0.2<br>(0.1-0.7)      | 0.3<br>(0.2-0.5)    | 0.5<br>(0.2-0.6)    | 0.671        |
| <b>Monocyte%</b>                               | 3.4<br>(1.5-8.3)      | 4.6<br>(2.8-5.7)    | 3.5<br>(1.9-7.3)    | 0.889        |
| <b>Basophils<br/>(10<sup>3</sup> cells/uL)</b> | 0.01<br>(0-0.06)      | 0.01<br>(0-0.03)    | 0.02<br>(0.01-0.1)  | 0.152        |
| <b>Basophil%</b>                               | 0.2<br>(0.1-0.7)      | 0.2<br>(0.1-0.4)    | 0.3<br>(0.20-0.8)   | 0.155        |
| <b>RBC<br/>(10<sup>6</sup> cells/uL)</b>       | 3.8<br>(3.1-4.4)      | 4.4<br>(4-4.6)      | 4.5<br>(3.8-5)      | 0.086        |
| <b>Hematocrit</b>                              | 32.5<br>(29.8-39)     | 38.9<br>(36.1-41.3) | 39.4<br>(34.5-43.5) | 0.089        |
| <b>Hemoglobin<br/>(g/L)</b>                    | 114<br>(95-133)       | 128<br>(111-135)    | 129<br>(111-144.5)  | 0.163        |
| <b>MCV</b>                                     | 89.4 ± 8.7            | 88.4 ± 5.9          | 88.4 ± 4.9          | 0.898        |
| <b>MCH</b>                                     | 29.8<br>(27.9-31.6)   | 29.2<br>(27.3-30.6) | 28.2<br>(26.8-31.5) | 0.719        |
| <b>MCHC</b>                                    | 335.5<br>(32.2-341.2) | 32.6<br>(31.1-340)  | 334<br>(30.8-343.5) | 0.640        |
| <b>Platelets<br/>(10<sup>3</sup> cells/uL)</b> | 229<br>(182-269)      | 201<br>(180-301)    | 217<br>(138-347.5)  | 0.942        |
| <b>RDW</b>                                     | 16.2<br>(14.4-20)     | 14.2<br>(13.8-14.9) | 15<br>(14.1-16.4)   | <b>0.046</b> |

Data are represented as mean ±SD or median and interquartile ranges. ICS: inhaled corticosteroid; eGFR: estimated glomerular filtration rate; MCV: mean corpuscular volume; MCH: mean corpuscular hemoglobin; MCHC: mean corpuscular hemoglobin concentration; RDW: red blood cell distribution width; GOLD: global initiative for obstructive lung disease \*calculated as NT-proBNP taken at the 30th day from admission minus the NT-proBNP taken at the day of admission.

**Table S5: Length of Hospital Stay ANOVA Statistical Analysis Results.**

| <b>Group</b>    | <b>Number</b> | <b>Mean (SD)<br/>(log10)</b> | <b>F (df)</b> | <b>P-value</b> | <b>P-value<br/>Trend</b> |
|-----------------|---------------|------------------------------|---------------|----------------|--------------------------|
| <b>Negative</b> | 20            | 0.9 (0.33)                   | 3.21 (2,69)   | 0.046          | 0.017                    |
| <b>Virus</b>    | 26            | 0.8 (0.35)                   |               |                |                          |
| <b>Bacteria</b> | 26            | 0.7 (0.28)                   |               |                |                          |

ANOVA statistical analysis results for the length of hospital stay between the three groups (log10 transformed).

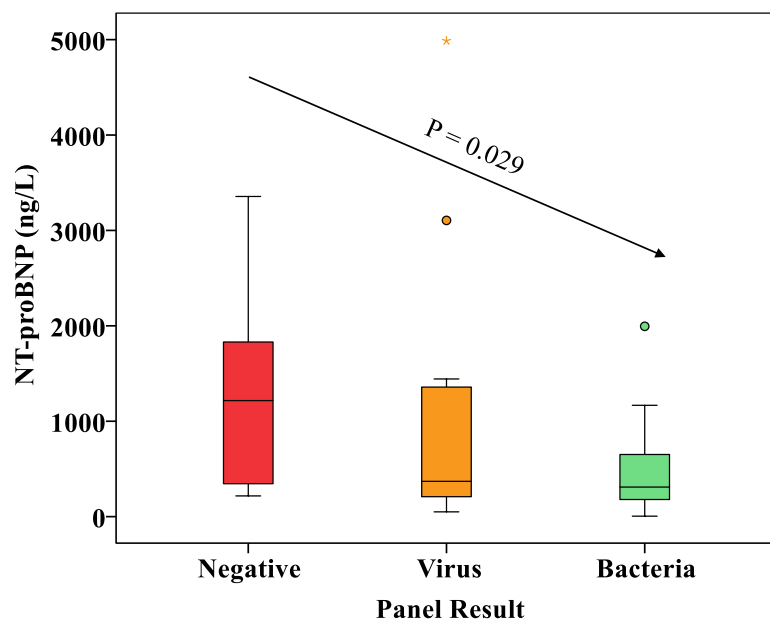

**Figure S2: Box Plots Depicting NT-proBNP Concentrations in the Three Groups.** A statistically significant trend ( $P=0.029$ ) in NT-proBNP concentrations was observed, with the pathogen-negative group having the highest concentrations, and the bacteria group having the lowest.

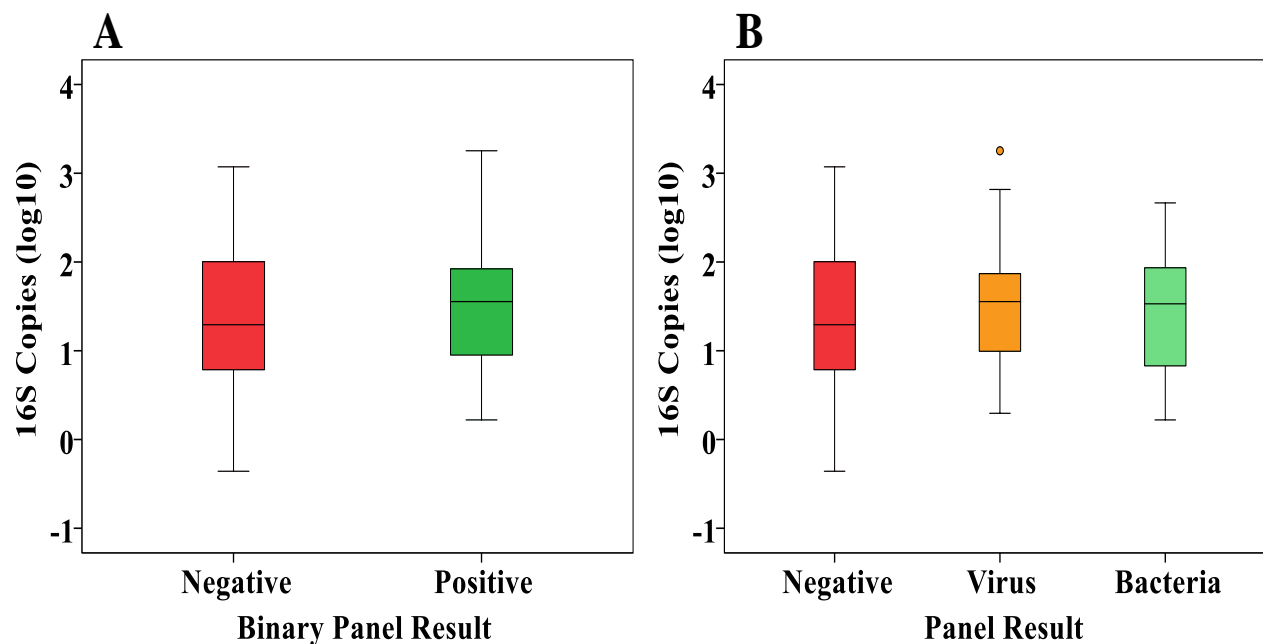

**Figure S3: Bacterial Load Comparisons Between Groups.** Box plots depicting the bacterial load in different groups. A) Pathogen-negative (non-infectious) and positive (infectious) groups. B) The positive (infectious) group subdivided by viral detection. There were no statistically significant differences between groups in bacterial load.

**Table S6: Causes of Death in the Study.**

| <b>Subject</b> | <b>Cause of Death</b>   |
|----------------|-------------------------|
| <b>1</b>       | Cardiac Arrest          |
| <b>2</b>       | Fatal Arrhythmia        |
| <b>3</b>       | End-stage COPD          |
| <b>4</b>       | End-stage COPD          |
| <b>5</b>       | Pneumonia               |
| <b>6</b>       | Subarachnoid Hemorrhage |
| <b>7</b>       | Unknown                 |
| <b>8</b>       | Unknown                 |
| <b>9</b>       | Unknown                 |
| <b>10</b>      | Unknown                 |
| <b>11</b>      | Unknown                 |
| <b>12</b>      | Unknown                 |

**Table S7: Randox Respiratory Multiplex Array II sensitivity and specificity**

| <b>Target</b>        | <b>RMA II Sensitivity</b> | <b>RMA II Specificity</b> |
|----------------------|---------------------------|---------------------------|
| <b>Flu A</b>         | 93.6                      | 97.5                      |
| <b>Flu B</b>         | 93.8                      | 99.4                      |
| <b>RSV</b>           | 95.1                      | 93.6                      |
| <b>PIV 1</b>         | 100                       | 98.5                      |
| <b>PIV 2</b>         | 100                       | 99.3                      |
| <b>PIV 3</b>         | 53.8                      | 98.9                      |
| <b>PIV 4</b>         | 100                       | 100                       |
| <b>HCV229E/ NL63</b> | 86.4                      | 100                       |
| <b>HCVOC43/ HKU1</b> | 96                        | 97.1                      |
| <b>HEV</b>           | 50                        | 100                       |
| <b>HRV</b>           | 74.6                      | 93.9                      |
| <b>HAV</b>           | 100                       | 93.7                      |
| <b>HBOV</b>          | 94.1                      | 98.1                      |
| <b>MPV</b>           | 100                       | 100                       |
| <b>MP</b>            | 98.7                      | 98.3                      |
| <b>CP</b>            | 100                       | 100                       |
| <b>LP</b>            | 100                       | 100                       |
| <b>SP</b>            | 74.1                      | 80                        |
| <b>MC</b>            | 70.8                      | 81.4                      |
| <b>HI</b>            | 86.1                      | 80.4                      |
| <b>BP</b>            | 100                       | 98.7                      |

Flu A, influenza type A. Flu B; influenza type B. RSV; respiratory syncytial virus. PIV; parainfluenza virus. HCV229E/ NL63; human corona virus type HCV229E/ NL63. HCVOC43/ HKU1; human corona virus type HCVOC43/ HKU1. HEV; human enterovirus. HRV; human rhinovirus. HAV; human adenovirus. HBOV; human bocavirus. MPV; metapneumovirus. MP; mycoplasma pneumoniae. CP; Chlamydomphila pneumoniae. LP; legionella pneumophila. SP; streptococcus pneumoniae. MC; Moraxella catarrhalis. HI; Hemophilus influenzae. BP; Bordetella Pertussis.

The functional sensitivity and specificity of this assay was determined by comparison of results against TaqMan probe based quantitative Real Time PCR (qRT-PCR). A total of 436 nucleic acid extracts from clinical specimens were screened using TaqMan qRT-PCR prior to analysis with Respiratory Multiplex Array II. Results for this array were compared to those of the TaqMan qRT-PCR “gold standard” for each sample (the data was taken from the user manual for the panel [Respiratory Multiplex Array II EV3947 User Manual]).

## References

1. Miller MR, Hankinson J, Brusasco V, et al. Standardisation of spirometry. *Eur Respir J*. 2005;26(2):319-338.
2. Sze MA, Abbasi M, Hogg JC, Sin DD. A Comparison between Droplet Digital and Quantitative PCR in the Analysis of Bacterial 16S Load in Lung Tissue Samples from Control and COPD GOLD 2. *PLoS One*. 2014;9(10):e110351.
